# Supplementary material
Source: PubMed Central journal article supplement (PMC5509996)
Supplement: EMBJ-36-2018-s001.pdf [file EMBJ-36-2018-s001.pdf]

Nascimbeni et al.

Table of content:

Appendix figure S1:

E-Syt2 localizes at the cell periphery and its overexpression increases the cortical ER (the number of ER-PM contacts).

Appendix figure S2:

LC3-associated phagocytosis (LAP) phagosomes do not co-localise with ER-PM contact sites.

Appendix figure S3:

The autophagosome-associated (but not the endosome-associated) PI3P pool co-distributes with E-Syt2 and E-Syt3.

Appendix figure S4:

Unlike WT-VMP1, the autophagy incompetent VMP1 mutant ( $\Delta$ atgD-VMP1) interacts permanently with E-Syt2 even upon starvation.

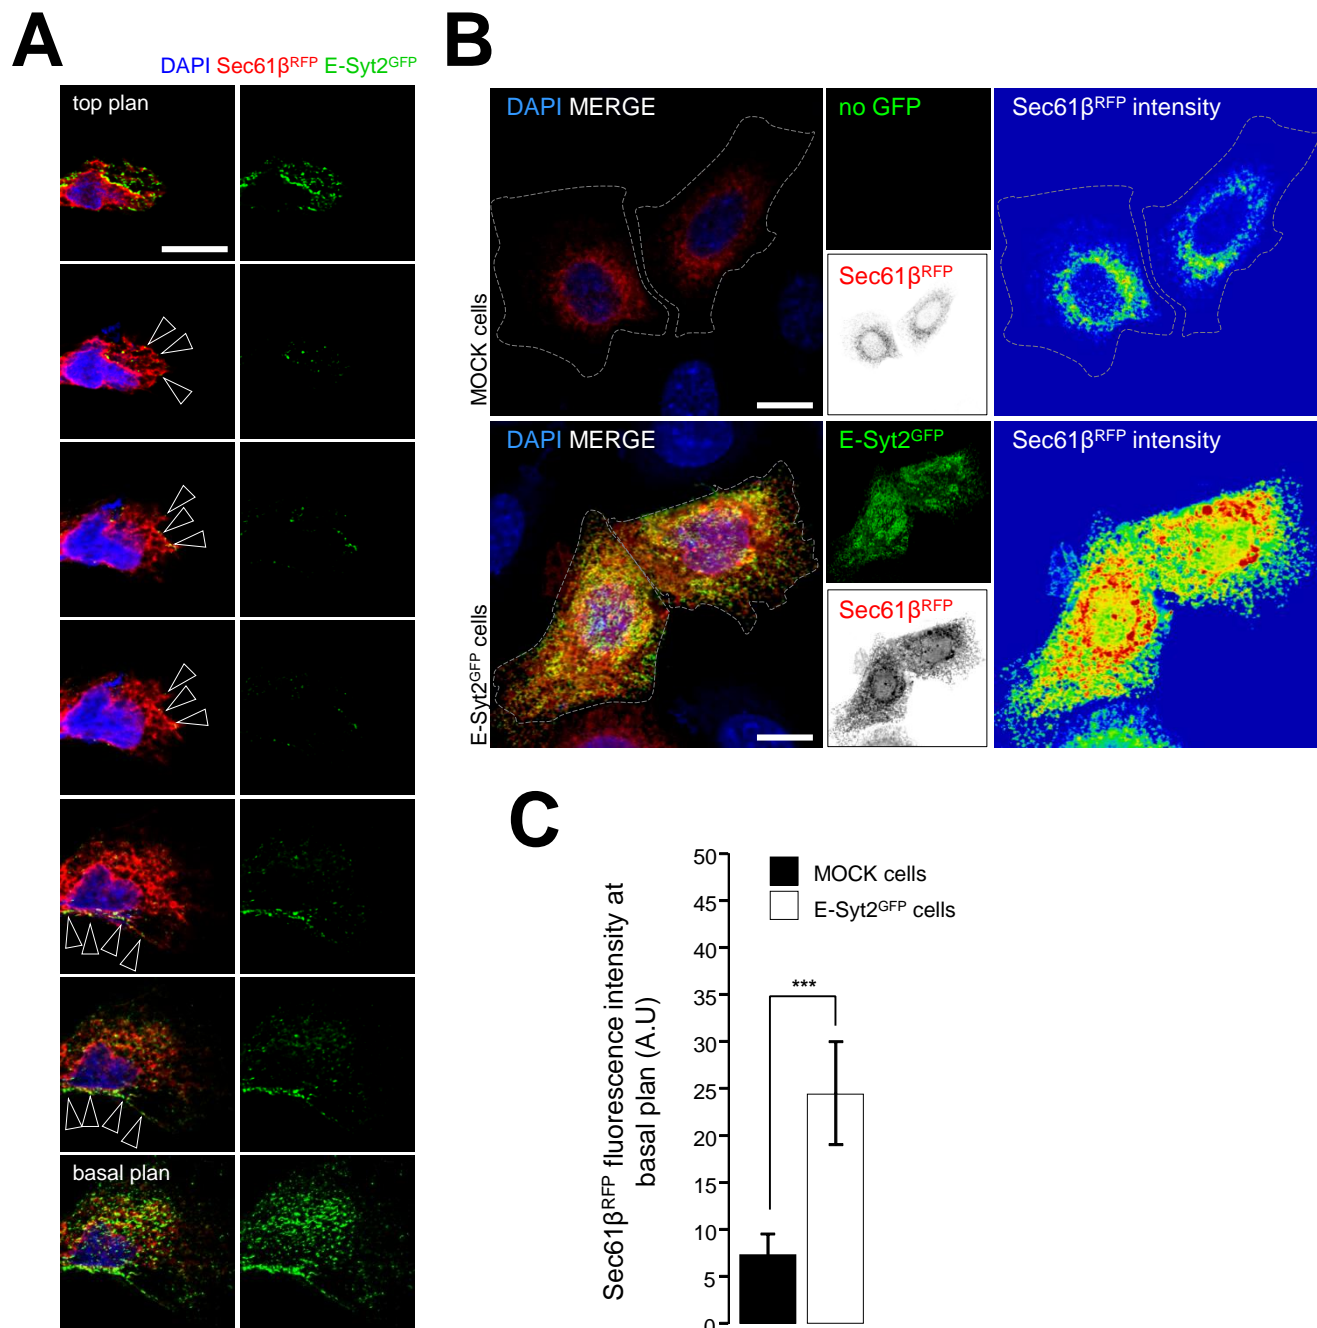

**Appendix figure S1: E-Syt2 localizes at the cell periphery and its overexpression increases the cortical ER (the number of ER-PM contacts).** Confocal microscope images of HeLa cells co-transfected with RFP-Sec61 $\beta$  and GFP-E-Syt2 or with mock vector. Nuclei are marked with DAPI. **A**, Sequential acquisitions going from top to basal plans of RFP-Sec61 $\beta$  and GFP-E-Syt2-transfected HeLa cells, showing the co-localization of E-Syt2 with the ER marker at the periphery of the cell. **B**, Fluorescence intensity of the ER marker Sec61 $\beta$ . Scale bars, 10  $\mu$ m. **C**, Quantification of the Sec61 $\beta$  fluorescence intensity at the basal plan in E-Syt2 transfected cells, compared to mock. Means  $\pm$  s.e.m. are plotted. \*\*\* $P$  < 0.001, unpaired two-tailed  $t$ -test.

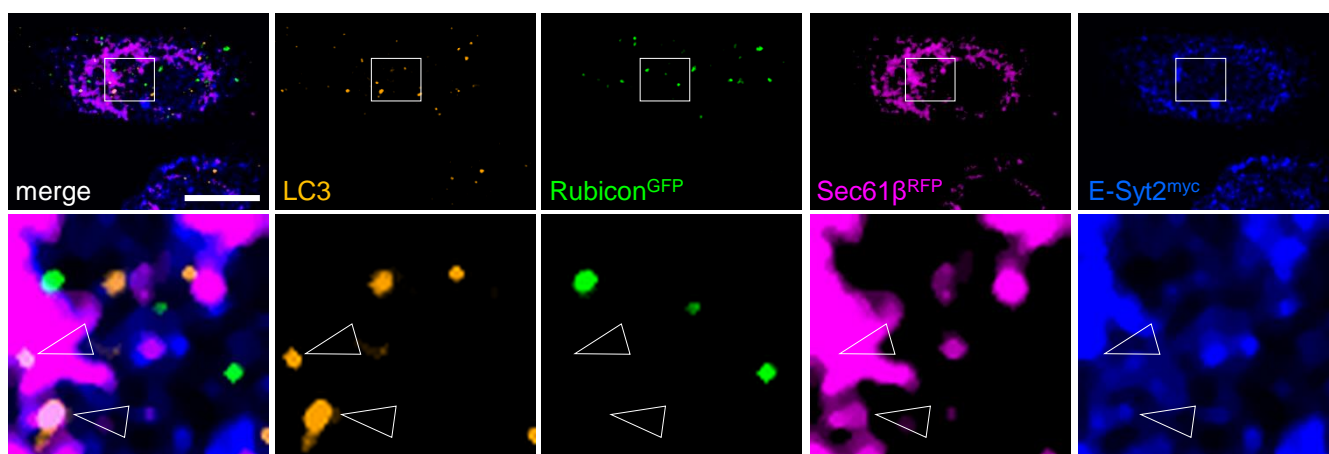

**Appendix figure S2: LC3-associated phagocytosis (LAP) phagosomes do not co-localise with ER-PM contact sites.** Confocal microscope images of HeLa cells co-transfected with GFP-Rubicon, RFP-Sec61 $\beta$ , and myc-E-Syt2 and immunostained for LC3. Empty arrowheads denote co-distribution of LC3 with Sec61 $\beta$  and E-Syt2. Scale bar, 10  $\mu$ m.

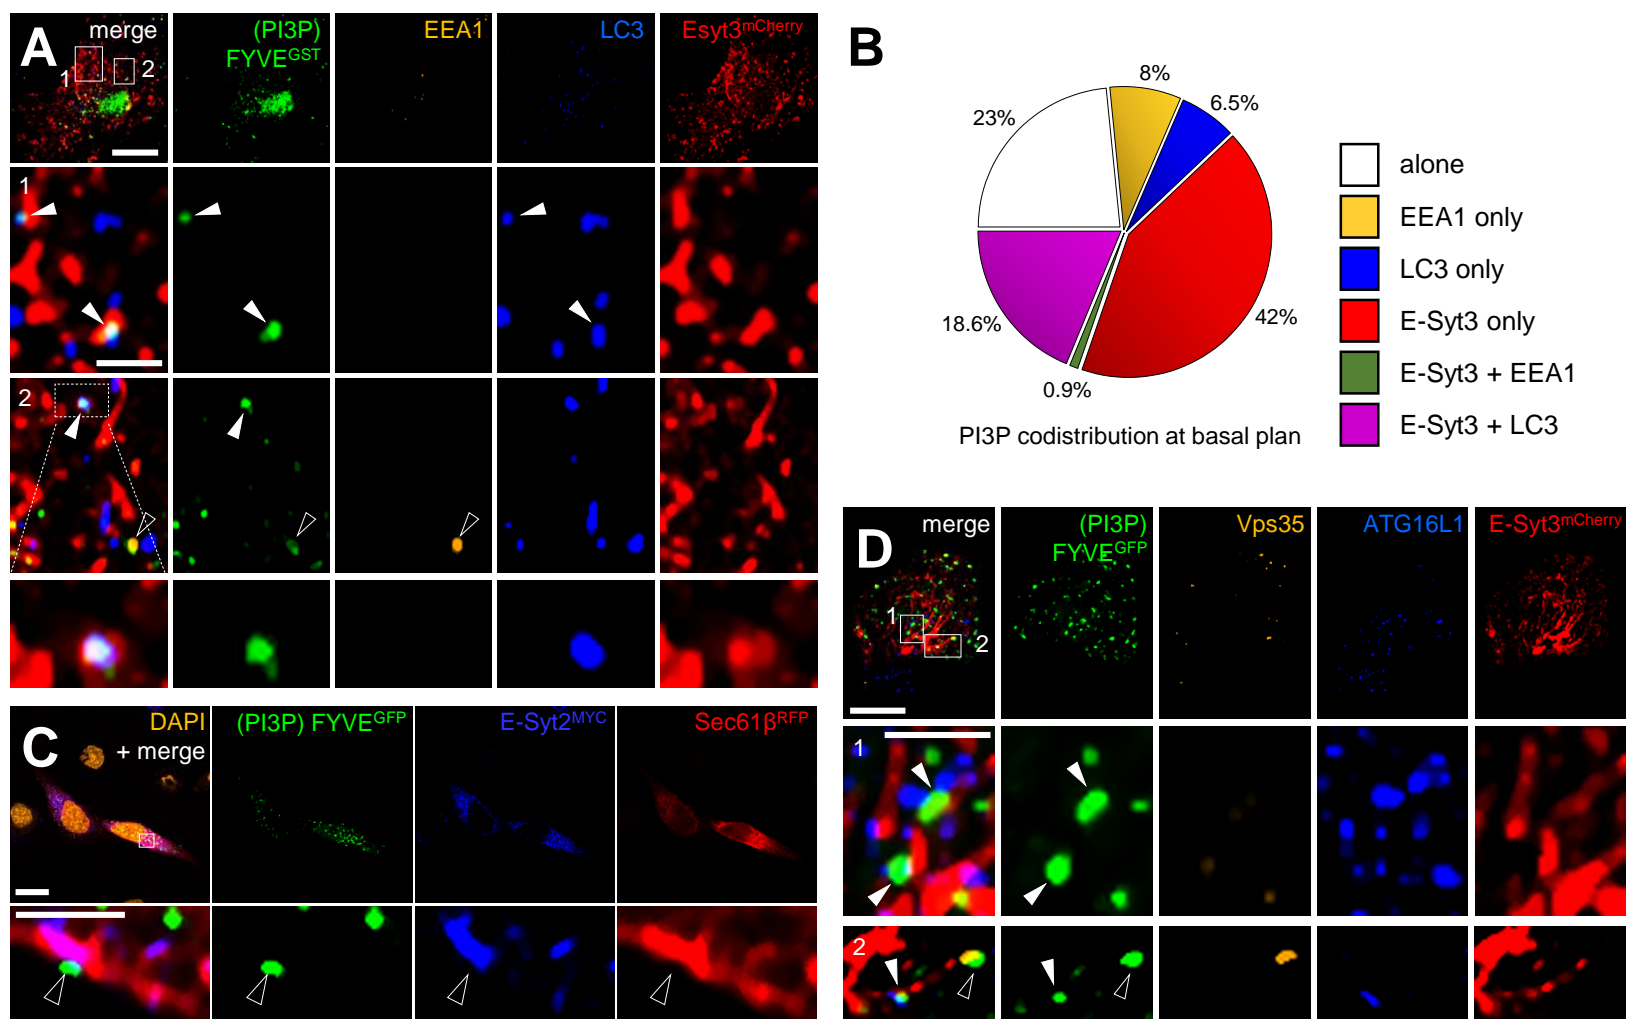

**Appendix figure S3: The autophagosome-associated (but not the endosome-associated) PI3P pool co-distributes with E-Syt2 and E-Syt3.** **A**, HeLa cells expressing mCherry-E-Syt3 were immunostained for PI3P (via a FYVE-GST peptide and anti-GST fluorescent antibody), EEA1 (an endosomal marker), and LC3. White arrowheads indicate co-distributing PI3P/LC3/E-Syt3, while empty arrowheads indicate co-distribution of PI3P/EEA1 only. **B**, Quantification of PI3P co-distribution with EEA1, E-Syt3 and LC3, at basal plan of the cell (as in a).  $n=80$  cells. **C**, Confocal images of HeLa cells co-transfected with GFP-2xFYVE (a PI3P marker), myc-E-Syt2, and RFP-Sec61 $\beta$  show PI3P at E-Syt2-positive ER (Sec61 $\beta$ - and E-Syt2-positive) sites (empty arrowheads). **D**, Confocal images of HeLa cells co-transfected with GFP-2xFYVE, VPS35 (an endosome marker), and mCherry-E-Syt3 and immunostained for ATG16L1 (an early autophagic marker) show the co-distribution of PI3P and ATG16L1 at ER-PM contact sites (E-Syt3-positive sites, white arrowheads), but not at endosomes (VPS35-positive sites, empty arrowheads). Scale bars, 10  $\mu$ m and 3  $\mu$ m (magnified areas).

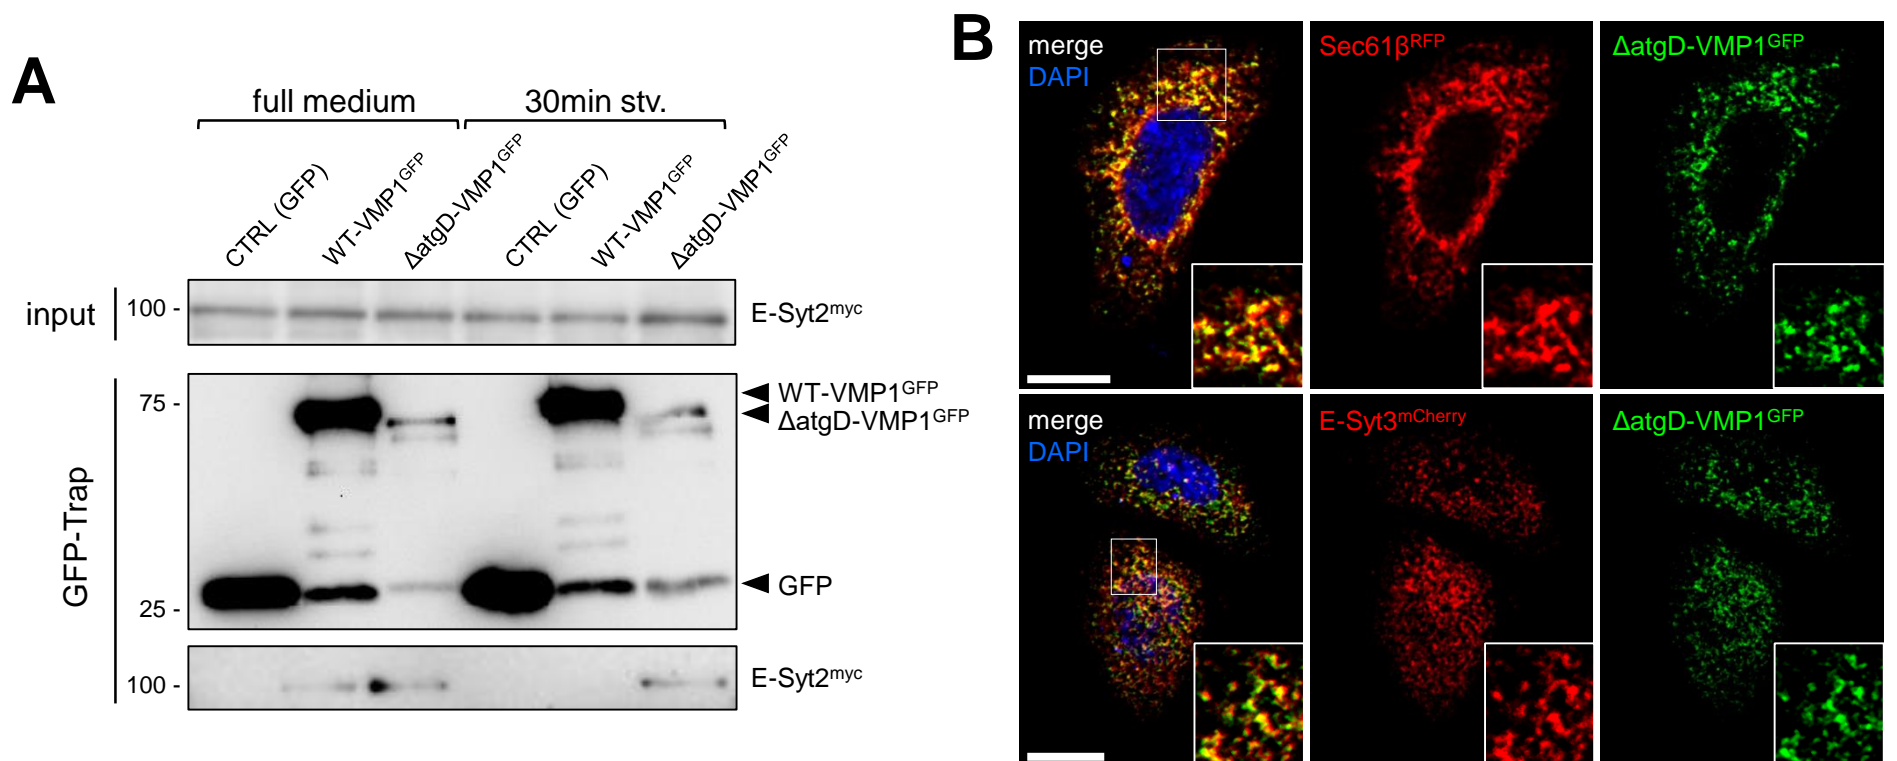

**Appendix figure S4: Unlike WT-VMP1, the autophagy incompetent VMP1 mutant ( $\Delta$ atgD-VMP1) interacts permanently with E-Syt2 even upon starvation.** **A**, HeLa cells transiently co-transfected with myc-E-Syt2 and GFP-VMP1 (WT) and GFP- $\Delta$ atgD-VMP1 or empty vector were grown in complete medium or starved (30 min). Cells were immunoprecipitated by GFP-trap beads and immunostained by antibodies indicated on the right. **B**, Confocal images of HeLa cells, showing the co-distribution of the co-transfected GFP- $\Delta$ atgD-VMP1 and the ER marker RFP-Sec61 $\beta$  or the ER-PM contacts marker mCherry-E-Syt3, upon starvation (3 h). Scale bars, 10  $\mu$ m.
